1 Title: Possible Regulation of Toll-Like  
2 Receptor 4 By Lysine Acetylation Through  
3 LPCAT2 Activity in RAW264.7 Cells

4 Running Title: Possible Regulation of TLR4 By Lysine  
5 Acetylation Through LPCAT2 Activity

6 Authors: Victory Ibigo Poloamina<sup>1</sup>, Wondwossen Abate<sup>2</sup>, Gyorgy Fejer<sup>1</sup>,  
7 Simon K. Jackson<sup>3</sup>.

8 <sup>1</sup>University of Plymouth, Faculty of Health, Plymouth, UK PL4 8AA

9 <sup>2</sup>University of Exeter, College of Medicine and Health, Exeter, UK EX1  
10 2HZ

11 <sup>3</sup>MolEndoTech Ltd, Brixham, UK TQ5 8BA

12

## 13 1 Abstract:

14 Inflammation is central to several diseases. TLR4 mediates inflammatory  
15 signals, however, there are gaps in the understanding of its mechanisms.  
16 Recently, TLR4 was found to co-localise with LPCAT2, a lysophospholipid  
17 acetyltransferase. This interaction influenced TLR4 subcellular localisation  
18 through an unknown mechanism.

19 In this study, we have combined computational analysis, RNA interference  
20 technology, and biochemical analysis to investigate the possibility of TLR4  
21 lysine acetylation and the influence of LPCAT2 on the detected lysine  
22 acetylation.

23 The results suggest for the first time that TLR4 can undergo lysine acetylation  
24 and LPCAT2 can influence TLR4 lysine acetylation. This lays a foundation for  
25 further research on the role of lysine acetylation on TLR4 and characterisation  
26 of LPCAT2 as a protein acetyltransferase.

## 27 2 Introduction:

28 Inflammation is central to many diseases such as cancer, asthma, sepsis, and  
29 cardiovascular diseases [1]. It can be caused by infection from various micro-

30 organisms, or by cell damage [2]. During bacterial infections, TLR4 plays a  
31 major role in mediating inflammatory signals after it recognises bacterial  
32 lipopolysaccharide bound to co-receptor CD14 [3,4]. Although there is  
33 scientifically established information on TLR4 mechanisms of signalling and  
34 protein-protein interactions, a lot is yet to be understood about TLR4  
35 mechanisms. Recently, TLR4 was found to co-localise with LPCAT2; this led  
36 to a change of its subcellular localisation [5]. Nonetheless, how LPCAT2  
37 affects the subcellular localisation of TLR4 is not known.

38 LPCAT2 is known as a lipid acyltransferase and acetyltransferase [6]. It is  
39 highly expressed in inflammatory cells such as peritoneal macrophages,  
40 microglia, and neutrophils [7]. In experimental allergic encephalomyelitis  
41 [8,9] and peripheral nerve injury [10–12], LPCAT2 is significantly expressed.  
42 Furthermore, LPCAT2 is suggested as a biomarker for sepsis and allergic  
43 asthma [13–15]. On the other hand, experimental conditions where LPCAT2  
44 is silenced or inhibited, results in the resolution of inflammation via decreased  
45 production of cytokines and LPCAT2 metabolites [5,10,16]. During  
46 inflammatory conditions, LPCAT2 and TLR4 expression increases in the lipid  
47 raft domain of RAW264.7 macrophage cell line, which serves as a platform for  
48 mediating inflammatory signals [5]. Acetylation is a post-translational

49 modification that can influence the subcellular localisation and function of a  
50 protein [17,18]. Although it commonly occurs on histones, there are several  
51 recent scientific publications that have identified acetylation on non-histone  
52 proteins [19]. Lysine acetylation can regulate protein function, interaction,  
53 and localisation [20,21]. LPCAT1 which has a very similar structure and  
54 function to LPCAT2 is known to palmitoylate histone 4, a protein [22]. This  
55 allows for the theory that LPCAT2 could carry out either of its enzymatic  
56 activities; acyltransferase or acetyltransferase on proteins such as TLR4.

57 Since several scientific publications suggest that LPCAT2 participates in  
58 inflammation, understanding the molecular mechanisms of LPCAT2 will  
59 contribute new knowledge on inflammation and could lead to new therapies  
60 for inflammatory disorders.

61 This study uses computational analysis, RNA interference technology, and  
62 biochemical analysis to detect lysine acetylation on TLR4 and the possibility  
63 of LPCAT2 influencing the detected TLR4 lysine acetylation.

## 64 3 Materials and Methods:

65 Chemicals reagents used to prepare buffers and BCA Assay kit were purchased  
66 from Sigma Aldrich, UK and Fisher Scientific, UK. Buffers used include RIPA  
67 buffer, Phosphate-buffered saline (PBS), Tris-buffered saline (TBS), Blocking  
68 Buffer, Cell lysis buffer, elution buffer, SDS sample buffer, and ECL detection  
69 reagent [23]. PolyPlus INTERFERin was purchased from Source Bioscience,  
70 UK. Pre-designed siRNA, Opti-MEM, Power SYBR Green, RNA to cDNA kit,  
71 and gel casting materials were purchased from Life Technologies, UK.  
72 Antibodies, Protein A/G agarose gel beads, and protein ladders were obtained  
73 from Santa Cruz Biotechnology, UK and Cell Signalling Technologies, UK.  
74 DMEM culture medium and other cell culture materials were purchased from  
75 Lonza, UK. PCR primers were designed with Primer3 Plus Bioinformatics  
76 Softwaew and NCBI BLAST, and purchased from Eurofins Genomics.

### 77 *3.1 Cell line and Culture:*

78 RAW264.7 cell line was obtained from the European Collection of Cell  
79 Cultures (ECACC) through Public Health England, UK. RAW264.7  
80 macrophages were maintained in Dulbecco's Modified Eagle Medium

81 (DMEM) [Lonza, BE12-914F] supplemented with 10%(v/v) Foetal Bovine  
82 Serum (FBS) [Labtech.com, BS-110] and 1%(v/v) 0.2M L-Glutamine [BE17-  
83 605E], and incubated at 37°C, 5% CO<sub>2</sub>. Lipopolysaccharide (*E. coli* O111:B4)  
84 [Sigma-Aldrich, L2630] was resuspended in LAL reagent water (<0.005EU/ml  
85 endotoxin levels) [Lonza, W50-640]. Cell culture medium was used to dilute  
86 all ligands to the needed concentration before stimulation.

### 87 *3.2 Transfection of RAW264.7 Cells with LPCAT2 siRNA:*

88 RAW264.7 cells were cultured 24 hours before gene silencing. Then  
89 using Opti-MEM (Reduced Serum Medium) as a diluent, a transfection  
90 mixture containing 7nM of siRNA was prepared and added to cells.  
91 The cells were incubated at 37°C, 5% CO<sub>2</sub> with Opti-MEM for 24 hours  
92 for efficient gene silencing.

### 93 *3.3 Reverse Transcription and Real-Time Quantitative PCR:*

94 The reaction mastermix contained 37%(v/v) nuclease-free, 230nM of target  
95 primers (a mixture of both forward and reverse primers), 60%(v/v) Power  
96 SYBR Green, and 3µl of ≥ 100ng/µl cDNA. The reaction was initiated at 95°C  
97 for 10 minutes, then up to 40 repeated cycles of denaturing (15 seconds, 95°C),

98 annealing, and extension (60 seconds, 60°C). GAPDH and ATP5B were used  
99 as an endogenous controls.

#### 100 *3.4 Immunoprecipitation:*

101 Equal amounts of whole cell lysates were pre-cleared, and incubated with  
102 target antibodies overnight at 4°C. Then protein A/G agarose gel beads were  
103 rinsed with PBS, added to the lysate-antibody mixture, and incubated  
104 overnight at 4°C. The mixture was centrifuged to separate the supernatant  
105 from protein A/G agarose beads. The beads were rinsed with PBS, then eluates  
106 were made with mild to harsh elution buffers [23].

#### 107 *3.5 Immunoblotting:*

108 Equal amounts of whole cell lysates and eluates were separated on pre-cast  
109 SDS-PAGE gels and blotted on to a PVDF membrane using a blot module. The  
110 blots were blocked with 0.1% bovine serum albumin in PBS-0.1% Tween 20,  
111 probed with primary and then HRP-conjugated secondary antibodies. The  
112 target proteins separated on the PVDF membrane were detected and analysed  
113 using ImageJ.

### 114 *3.6 Computational Analysis:*

115 Computational analysis of mouse protein sequences obtained from Uniprot  
116 database was carried out using GPS-PAIL 2.0 [24], and R Programming  
117 Software (packages used were: Peptides, Biostrings, phangorn, tidyverse, ape,  
118 seqinr, rentrez, msa, and ASEB). Both gene (rentrez) and protein sequences  
119 were aligned using multiple sequence alignment (msa). The physicochemical  
120 properties of peptides were analysed using Peptides package. Phylogenetic  
121 trees were made using maximum parsimony with SeaView version 4 [25] and  
122 phangorn package. Sequence IDs: LPCAT2- Q8BYI6, NM173014; LPCAT1-  
123 Q3TFD2, NM145376; KAT2A- Q9JHD2, NM020004; KAT2B- Q9JHD1,  
124 NM020005; CREBBP- NM001025432; ELP3- NM001253812; EP300-  
125 NM177821; KAT5- NM001362372; KAT6A- NM001081149; KAT6B-  
126 NM017479; KAT8- NM026370.

### 127 *3.7 Data Analysis:*

128 Statistical Analysis was carried out in R Statistical Programming  
129 Software and graphs were plotted using ggplot2 package. Independent  
130 experiments were repeated at least 3 times. Data represent Mean  $\pm$   
131 Standard Error of Mean unless stated otherwise. Paired T-Test with



132 Dunnetts T3 multiple comparison test were used for statistical analysis.

133 All statistical tests were significant at 95% confidence interval,  $p \leq$

134 0.05.

## 135 4 Results:

136 *4.1 Transfection of RAW264.7 Cells with LPCAT2 siRNA Does Not Affect*

137 *the Basal Function of RAW264.7 Cells:*

138 The gene and protein expression of LPCAT2 were analysed to confirm the

139 knockdown of LPCAT2. Figure 1A shows that LPCAT2 gene is significantly

140 lower in cells transfected with LPCAT2 siRNA ( $0.25 \pm 0.02$ ,  $p = 0.0015$ ).

141 Likewise, LPCAT2 protein decreased (4-fold) in cells transfected with

142 LPCAT2 siRNA (Figure 1B&C).

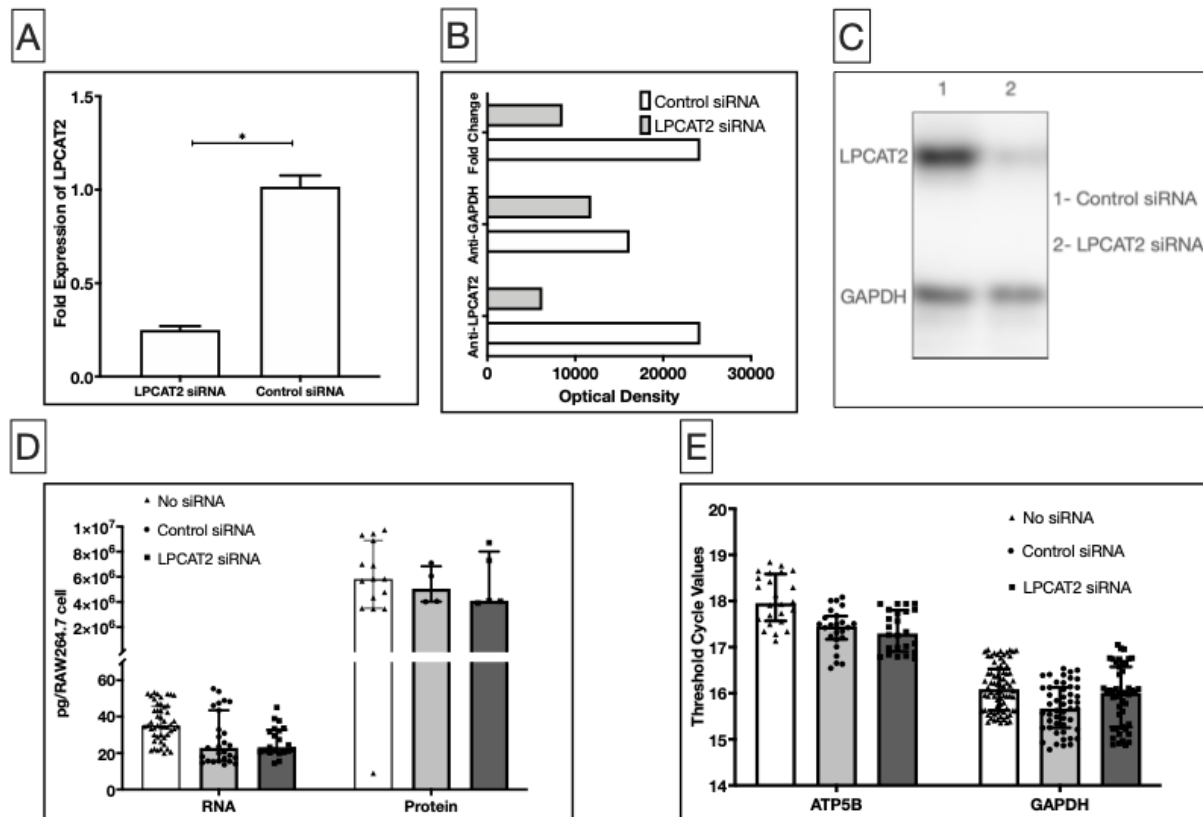

143

144

Figure 1: Transfection of RAW264.7 cells with LPCAT2 siRNA causes  $\geq 70\%$  decrease in LPCAT2 gene expression (A) and  $\geq 50\%$  decrease in LPCAT2 protein expression (B&C). \* $p \leq 0.05$ . Fold change shows the optical density of LPCAT2 normalised to GAPDH. Data represents mean of at least 3 independent experiments ( $n \geq 3$ )  $\pm$  standard error (A), and optical densities (B) of western blots (C). Transfection of siRNA into RAW264.7 cells does not cause a significant difference in total RNA and total protein (D), and in the expression of housekeeping genes ATP5B and GAPDH (E) when compared to cells with no transfected siRNA. Data represents the median of at least 3 independent experiments ( $n \geq 3$ )  $\pm$  interquartile range.

145 The basal function of RAW264.7 cells after transfecting the cells with

146 LPCAT2 siRNA was analysed by measuring the total amount of RNA and

147 Protein, and the gene expression of housekeeping genes ATP5B and GAPDH.

148 Figure 1C shows that transfection of RAW264.7 cells with LPCAT2 siRNA

149 does not significantly affect the total amount of RNA (23.25pg/RAW264.7

150 cell; 20.56pg/RAW264.7 cell to 32.78 pg/RAW264.7 cell) when compared

151 with non-transfected cells (35.2 pg/RAW264.7 cell; 29.39pg/RAW264.7 cell

152 to 45.84pg/RAW264.7 cell,  $p = 0.98$ ) and the total amount of protein ( $4.09 \times$   
153  $10^6$ pg/RAW264.7 cell;  $3.98 \times 10^6$  pg/RAW264.7 cell to  $8.01 \times 10^6$ pg/RAW264.7  
154 cell) when compared with non-transfected cells ( $5.82 \times 10^6$ pg/RAW264.7 cell;  
155  $3.5 \times 10^6$ pg/RAW264.7 cell to  $8.89 \times 10^6$ pg/RAW264.7 cell,  $p = 0.98$ ). Likewise,  
156 Figure 1D shows that transfection of RAW264.7 cells with LPCAT2 siRNA  
157 does not significantly affect the gene expression of housekeeping gene ATP5B  
158 (17.3; 16.9 to 17.8) when compared with non-transfected cells (17.96; 17.57 to  
159 18.58,  $p = 0.95$  ) and GAPDH (16.01; 15.27 to 16.57) when compared with  
160 non-transfected cells (16.09; 16.52 to 15.63,  $p = 0.95$ ).

#### 161 *4.2 Analysis of The Relatedness of LPCAT2 to Commonly Known Lysine* 162 *Acetyltransferases (KATs)*

163 Using R Statistical Programming Software, the genetic relatedness of LPCAT2  
164 to other KATs was analysed. As LPCAT1 is a very similar protein to LPCAT2,  
165 it was included as a positive control. Indeed, Figure 2A shows that LPCAT2  
166 and LPCAT1 belong to the same family. Moreover, it suggests that LPCAT2  
167 and LPCAT1 belong to the same superfamily as KAT2A and KAT2B.  
168 Therefore, the similarity of the protein sequences was analysed by aligning  
169 LPCAT2 to each protein from node 7 in Figure 2A. Figure 2B-D shows that

170 LPCAT2 vs LPCAT1 has less than 5% gaps in alignment (B), whereas, LPCAT2  
171 vs KAT2A (C) and LPCAT2 vs KAT2B (D) have less than or equal to 35% gaps  
172 in alignment.

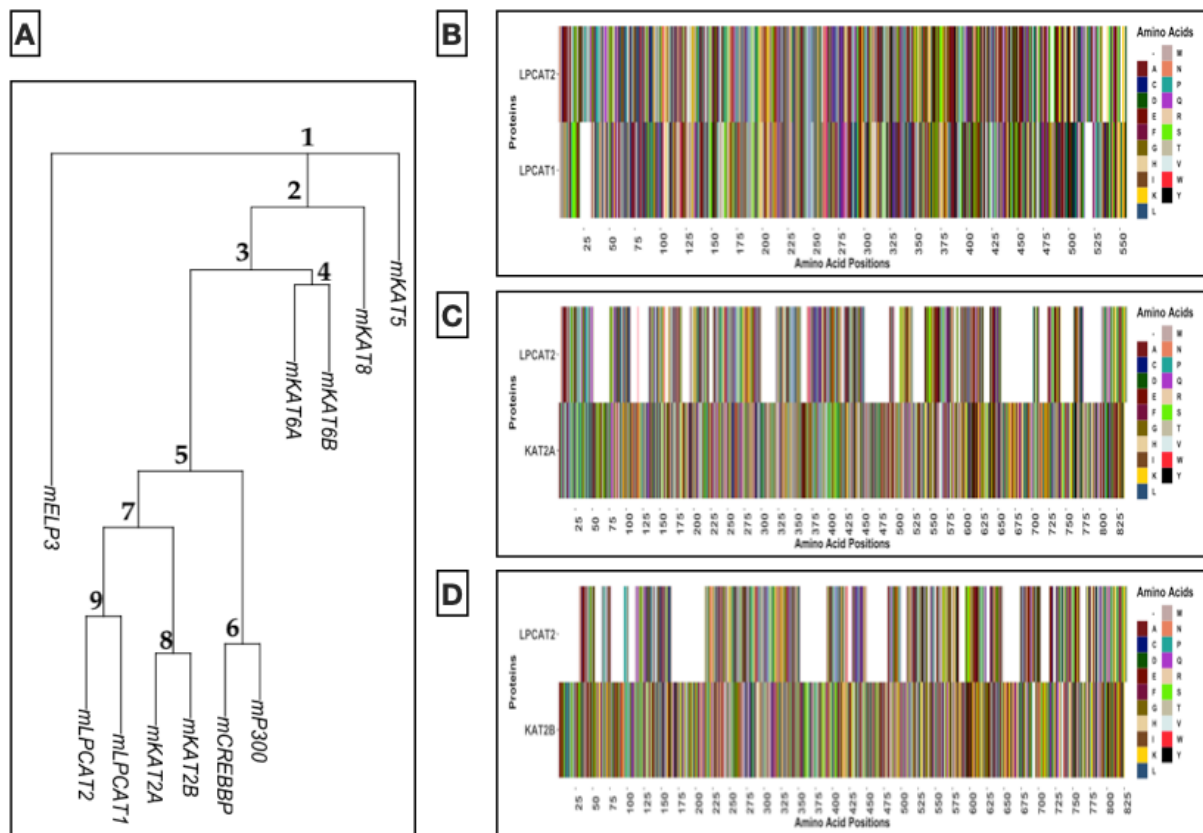

173

Figure 2: Analysis of The Relatedness of LPCAT2 To Other Lysine Acetyltransferases in Mice. **A** – Phylogenetic tree showing the degree of relatedness of LPCAT1 gene, LPCAT2 gene, and genes of other KATs. Numbers indicate node positions. **B to D** – Sequence alignment of proteins in node 7, white space indicates gaps in alignment. Letters symbolising amino acids are IUPAC standards.

174

### 175 4.3 LPCAT2 Influences Pan-Lysine Acetylation in RAW264.7 Cells

176 Acetylated lysine residues were detected using acetylated lysine antibodies.  
177 Figure 3 shows that stimulating RAW264.7 cells with LPS increased the  
178 density of some acetylated lysine protein bands, especially around 10kDa. The

179 bars show fold change after normalising optical densities to acetylated alpha  
180 tubulin densities. Some protein bands (100kDa and ~5kDa) showed  $\geq 50\%$   
181 reduction after knockdown of LPCAT2 with or without LPS (Figure 3C).  
182 Although the median is very similar across all treatment, the upper quartile is  
183 lower when LPCAT2 is silenced (Figure 3B). This indicates lower band  
184 intensities of lysine acetylated proteins after LPCAT2 knockdown.

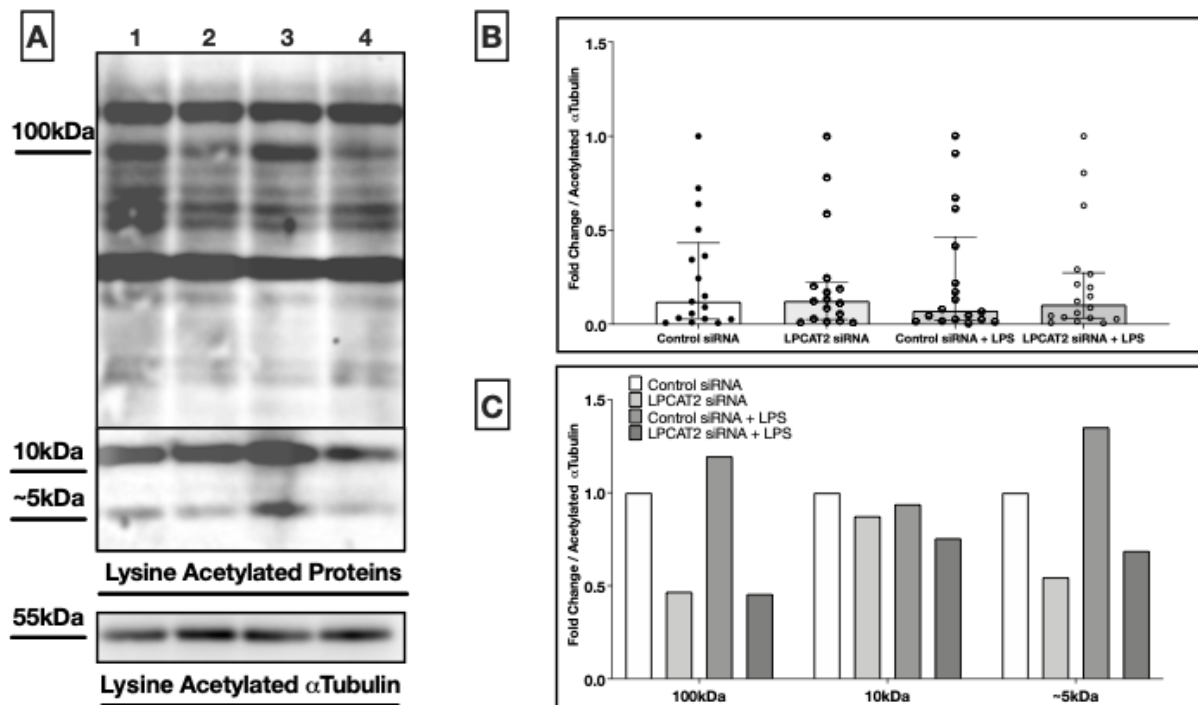

185

186

Figure 3: Analysis of Pan-Lysine Acetylation in Lipopolysaccharide-Stimulated RAW264.7 Cells. (A) – Western blot image of lysine acetylated proteins. Acetylated Alpha Tubulin was used as a positive control. Lane 1 - Control siRNA, Lane 2 - LPCAT2 siRNA, Lane 3 - Control siRNA + LPS, Lane 4 - LPCAT2 siRNA + LPS. (B) – Fold change in optical density of lysine acetylated proteins normalised to acetylated  $\alpha$ Tubulin. Bars represent median and error bars represent interquartile range. (C) – Fold change in optical density of bands at 100kDa, 10kDa, and ~5kDa normalised to acetylated  $\alpha$ Tubulin and control siRNA.

#### 187 4.4 *In Silico* Prediction of Lysine Acetylation of Lipopolysaccharide

##### 188 *Receptors*

189 Due to the presence of acetylated lysine which can be induced by LPS and

190 decreased by silencing LPCAT2 at 100kDa, the protein sequences of mouse

191 TLR4 which is about 100kDa in size and its co-LPS-receptors; MD2 and CD14

192 were analysed for the possible presence of lysine residues that can be

193 acetylated. Two software were used for this analysis; GPS-PAIL version 2.0

194 and ASEB. Table 1 shows that GPS-PAIL version 2.0 software predicted that

195 TLR4 is acetylated on the lysine residue at position 817 by CREBBP, but CD14  
 196 and MD2 did not show any possibility for lysine acetylation. RelA was used as  
 197 a positive control, as it is already experimentally proven to undergo lysine  
 198 acetylation [26].

**Table 1: *In Silico* Prediction of Lysine Acetylation in lipopolysaccharide Receptors Using GPS-PAIL Version 2.0.**

| Protein | Position | Peptide                 | Score | Cut-off | Acetyltransferase |
|---------|----------|-------------------------|-------|---------|-------------------|
| CD14    | NA       | NA                      | NA    | NA      | NA                |
| MD2     | NA       | NA                      | NA    | NA      | NA                |
| TLR4    | 817      | KNALLDG <b>K</b> ASNPEQ | 2.09  | 1.79    | CREBBP            |
| RelA    | 310      | KRTYETF <b>K</b> SIMKKS | 2.32  | 1.79    | CREBBP            |
| RelA    | 122      | NLGIQCV <b>K</b> KRDLEQ | 2.08  | 1.69    | KAT2B             |

NA indicates that no sites of lysine acetylation was detected. Position indicates the position of the lysine with predicted acetylation. The acetyltransferases were also predicted based on known information about binding sites of these enzymes. The score indicates the probability of acetylation. The higher the score, the higher the chance of acetylation. The cut-off is the number under the threshold. This analysis was carried out using a high threshold. Red letters signify the supposed position of lysine acetylation.

199 *Table 1*

200 Further analysis of mouse TLR4 protein sequence using ASEB revealed the  
201 possibility of more than 1 lysine residue undergoing lysine acetylation. In  
202 Table 2, the lysine residue at position 817 was predicted to undergo lysine  
203 acetylation by CREBBP along with lysine residues at positions 367 and 503.  
204 The lysine residue at position 152 was predicted to undergo lysine acetylation  
205 by KAT2A and or KAT2B.

| <b>Table 2: <i>In Silico</i> Prediction of Lysine Acetylation of TLR4 ASEB</b>                                                                                  |                            |                          |
|-----------------------------------------------------------------------------------------------------------------------------------------------------------------|----------------------------|--------------------------|
| <b>Position</b>                                                                                                                                                 | <b>Peptide</b>             | <b>Acetyltransferase</b> |
| 152                                                                                                                                                             | PIGQLITL <b>K</b> KLNVAHNF | KAT2A, KAT2B             |
| 367                                                                                                                                                             | NKGSISFK <b>K</b> VALPSLSY | CREBBP                   |
| 503                                                                                                                                                             | NLTFDL <b>S</b> KCQLEQISW  | CREBBP                   |
| 817                                                                                                                                                             | KNALLD <b>G</b> KASNPEQ    | CREBBP                   |
| ASEB predicted more peptides to undergo lysine acetylation in TLR4. However, the peptides selected and shown in this table all have a p-value of $p \leq 0.1$ . |                            |                          |

206 *Table 2*

207 To understand the properties of the predicted peptides and predict the  
208 potential roles of the acetylated lysine residues, analysis of each peptide  
209 predicted to contain acetylated lysine residue was carried. As shown in Table  
210 3, all peptides were globular, suggesting that the peptides are situated either



211 on the extracellular or the intracellular end of TLR4, but not the  
212 transmembrane region. The high aliphatic index values also predict that these  
213 peptides are thermostable.

| <b>Table 3: Properties of Predicted Lysine Acetylated Peptides in TLR4</b> |                            |           |           |                          |
|----------------------------------------------------------------------------|----------------------------|-----------|-----------|--------------------------|
| <b>Position</b>                                                            | <b>Peptide</b>             | <b>HI</b> | <b>AI</b> | <b>Membrane Position</b> |
| 152                                                                        | PIGQLITL <b>K</b> KLNVAHNF | 0.29      | 137.7     | Globular                 |
| 367                                                                        | NKGSISFK <b>K</b> VALPSLSY | -0.05     | 91.8      | Globular                 |
| 503                                                                        | NLTFLDLS <b>K</b> CQLEQISW | 0.02      | 114.7     | Globular                 |
| 817                                                                        | KNALLD <b>G</b> KASNPEQ    | -1.17     | 65.3      | Globular                 |

Hydrophobicity index (HI) indicates a lipophilic or hydrophilic peptide. The aliphatic index (AI) indicates thermostability. All peptides are predicted to be globular because of their low hydrophobicity index.

214 *Table 3*

#### 215 *4.5 LPCAT2 Influences the Lysine Acetylation of Toll-like Receptor 4*

216 Further analysis to confirm the presence of lysine acetylation in TLR4 was  
217 carried out by immunoprecipitating TLR4 and blotting for acetylated lysine  
218 residues. Figure 4A shows that at 100kDa, TLR4 was detected in both blots  
219 using TLR4 antibodies and acetylated lysine antibodies after  
220 immunoprecipitation of TLR4. In Figure 4B, the optical densities of TLR4 in  
221 both TLR4 blots and acetylated lysine blots were both within the range of

222 3000 to 4500. Treatment of RAW264.7 cells with LPS did not show any  
223 difference.

224 In an attempt to ensure that the protein being detected is TLR4, we silenced  
225 the expression of TLR4 in RAW246.7 cells and repeated the analysis. In this  
226 case, acetylated lysine proteins were immunoprecipitated and eluates were  
227 analysed for the presence of TLR4. The postulation was that if the detected  
228 protein was not TLR4, then it will not decrease when TLR4 is silenced and it  
229 will not be detected by TLR4 antibody. In Figure 4C, we see again that TLR4  
230 was detected from eluate of lysine acetylated proteins by TLR4 antibody.  
231 Figure 4D shows again that knockdown of TLR4 reduced the presence of  
232 lysine acetylation on TLR4 by  $\geq 50\%$ . This is further evidence of the presence  
233 of lysine acetylation on TLR4. TLR4 expression was also reduced in cells not  
234 treated with LPS but transfected with TLR4 siRNA (Poloamina, 2021).

235 As the initial study was to understand the role of LPCAT2 on lysine  
236 acetylation, we sought to determine the influence of LPCAT2 on the detected  
237 lysine acetylation on TLR4. Figure 4E, shows a TLR4 blot of acetylated lysine  
238 eluates from RAW264.7 cells. The optical densities in Figure 4F shows  $\geq 50\%$   
239 decrease in acetylated TLR4 lysine after knockdown of LPCAT2.

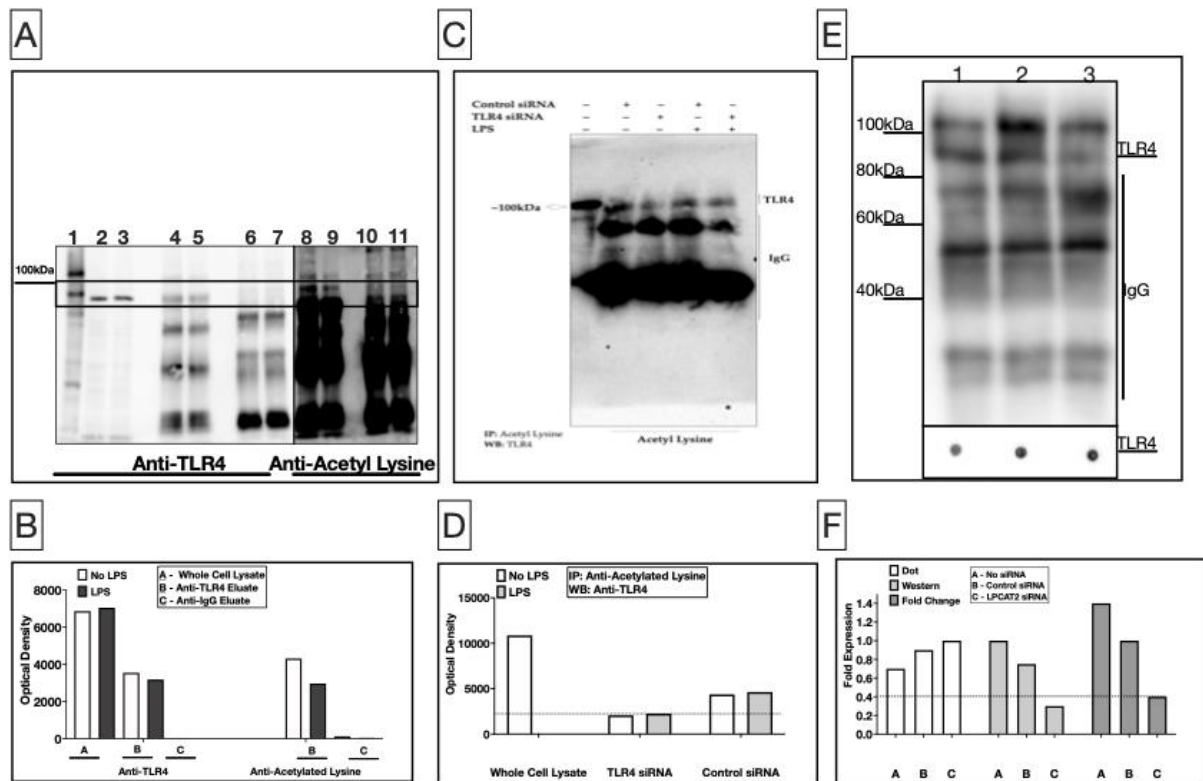

240

Figure 4: **A**– Acetylated Lysine Detected on Precipitated TLR4. Lane 1- biotinylated protein ladder; Lanes 2 & 3 - TLR4 blots of whole cell lysates; Lanes 4 & 5 -TLR4 blots of TLR4 eluate; Lanes 6 & 7 - TLR4 blots of IgG eluate; Lanes 8 & 9 -acetylated lysine blots of TLR4 eluate; Lanes 10 & 11 - acetylated lysine blots of IgG eluate. Lanes 2, 4, 6, 8, and 10 are samples from RAW264.7 cells not treated with LPS, whereas lanes 3, 5, 7, 9, and 11 are samples from RAW264.7 cells treated with 100ng/ml LPS. **B**– Optical densities of protein bands at 100kDa. Anti-IgG elution was used as isotype control. **C**– TLR4 blot (WB) of acetylated lysine precipitates (IP). The first lane is a blot of lysate of RAW264.7 cells not transfected with siRNA or treated with LPS. The other lanes are blots of acetylated lysine eluates. - indicates absence, and + indicates presence. **D**– Optical densities of protein bands at 100kDa. **E**– Acetylated lysine blots (WB) of TLR4 precipitates (IP). Lane 1 - No siRNA, Lane 2 - Control siRNA, Lane 3 - LPCAT2 siRNA. TLR4 dot blots of uniform amounts of proteins from TLR4 eluates were used as controls of protein amounts. **F**– Optical density of protein bands at ~90kDa. Fold change refers to values normalised to dot blot of TLR4 in eluates and to control siRNA.

241

## 242 4.6 LPCAT2 Regulates the Expression of Interferon Beta and Interferon-

### 243 Inducible Protein 10 (IP10):

244 A recent publication has shown that LPCAT2 can regulate the expression of  
 245 pro-inflammatory cytokines; TNF $\alpha$  and IL6 (Abate et al, 2020), however,  
 246 interferon-beta (IFN $\beta$ ) and interferon-inducible protein 10 (IP10) which are

247 dependent on TLR4-Trif signalling pathway, were not analysed. Figure 5A  
248 shows that knockdown of LPCAT2 results in a significant decrease ( $5.38 \pm$   
249  $0.69$ ,  $p = 0.00025$ ) in the gene expression of IFN $\beta$  in cells stimulated with  
250 100ng/ml lipopolysaccharide. IP10 which can be also be induced by IFN $\beta$ , was  
251 analysed. Figure 5B shows that knockdown of LPCAT2 significantly decreased  
252 the gene expression ( $168.7 \pm 32.27$ ,  $p = 0.021$ ). In non-treated cells,  
253 knockdown of LPCAT2 did not effect a significant change in IFN $\beta$  gene ( $p =$   
254  $0.46$ ), and IP10 gene ( $p = 0.97$ ) expression.

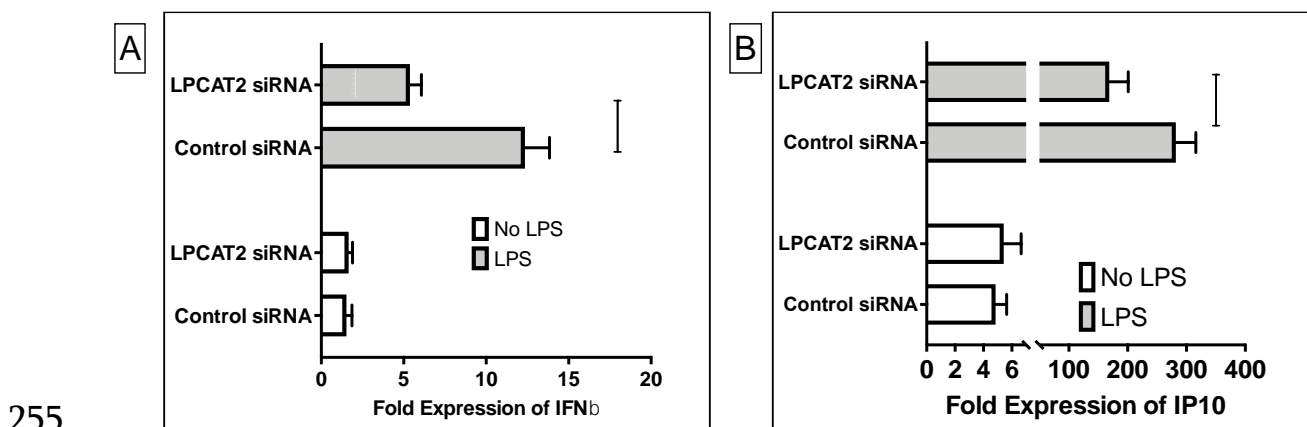

256 Figure 5: Knockdown of LPCAT2 affects the gene expression of Interferon beta, IFN $\beta$  (A) and interferon-inducible protein 10, IP10 (B) in RAW264.7 cells stimulated with TLR4 ligand (100ng/ml of *E. coli* O111:B4 lipopolysaccharide). Non-treated RAW264.7 cells did not show any significant difference. \* $p \leq 0.05$ . Data represents the mean of at least 3 independent experiments ( $n \geq 3$ )  $\pm$  standard error.

## 257 5 Discussions:

258 LPCAT2 is commonly known as a lipid-modifying enzyme. However, there is  
259 scientific evidence that LPCAT1, which is similar in structure and function to

260 LPCAT2, palmitoylates histone 4 [22]. This implies that LPCAT2 may modify  
261 proteins. Moreover, LPCAT2 co-localises with TLR4 and modifies its  
262 subcellular localisation and hence its function, through an unknown  
263 mechanism [5]. Addition of acyl groups to proteins can regulate its subcellular  
264 localisation and or function [27]. Using both computational and biochemical  
265 analysis, our results suggest that TLR4-LPCAT2 co-localising may result in the  
266 lysine acetylation of TLR4 which may influence its subcellular localisation.

267 *5.1 LPCAT2 Gene and Protein Sequence is homologous to other lysine*  
268 *acetyltransferases:*

269 50% to 70% homology is required for conservation of enzyme functions [28].  
270 Figure 2 shows that LPCAT2 shares at least 65% similarity with KAT2A and  
271 KAT2B, which are established lysine acetyltransferases. Moreover, analysis of  
272 their gene sequences showed that LPCAT2, LPCAT1, KAT2A, and KAT2B  
273 evolved from the same superfamily. The results from this computational  
274 analysis lays a foundation for further scientific experiments that will be  
275 required to classify LPCAT2 as a lysine acetyltransferase.

276 *5.2 LPCAT2 Influences Lysine Acetylation Detected on TLR4 Protein:*

277 The housekeeping genes– ATP5B and GAPDH and the total RNA and protein  
278 amount did not undergo any significant changes when RAW264.7 cells were  
279 transfected with siRNA (Figure 1). This eliminates the possibility that the  
280 observed gene expression or protein expression is as a result of overall changes  
281 in the cell.

282 Palmitoylation can regulate the subcellular localisation and signalling of  
283 TLR2. It is also present on other TLRs like TLR5 and TLR10, but not on TLR4  
284 [29]. As TLR4 was not found amongst palmitoylated proteins, we explored the  
285 next possibility which is acetylation. LPCAT2 has both acyltransferase and  
286 acetyltransferase [6], however, unlike LPCAT1 there is no previously  
287 published evidence that suggests that LPCAT2 can carry out its enzymatic  
288 activities on proteins. Our results show that when LPCAT2 is knocked down  
289 in RAW264.7 cells, the band intensities of some lysine acetylated proteins  
290 reduces especially at 100kDa and 5kDa (Figure 3). Except TLR4, there are  
291 many other proteins with an approximate mass of 100kDa. On the UniProt  
292 database [30], there are about 3500 proteins between 90kDa and 110kDa. Only  
293 about 25 of these proteins have published evidence of lipidation. Therefore, a

294 more TLR4-specific study is needed to confirm its lysine acetylation.  
295 Computational analysis to predict TLR4 lysine acetylation suggests that TLR4  
296 may undergo lysine acetylation on lysines 152, 367, 503, and 817 catalysed by  
297 KAT2A, KAT2B, or CREBBP (Table 1 & Table 2). Biochemical analysis shows  
298 the presence of lysine acetylation on TLR4 (Figure 4), however, further  
299 experiments will be required to know the specific lysine residues that are  
300 acetylated on TLR4 and their role in regulating TLR4 function. In Table 3, we  
301 predicted that the TLR4 peptides that have acetylated lysine residues are  
302 hydrophilic and globular. Although this is not confirmatory, it suggests that  
303 lysine acetylation may be occurring on the extracellular domain of TLR4 where  
304 it binds to its ligands, or the intracellular domain of TLR4 where it binds to  
305 other proteins and transmits signals. Indeed, a thesis suggested that TLR4  
306 lysine acetylation influences its interaction with its adaptor proteins MyD88,  
307 TRAM, and TRIF; which eventually affects the production of inflammatory  
308 cytokines [31]. We have previously shown that knockdown of LPCAT2  
309 reduces MyD88-dependent cytokines after LPS-TLR4 interaction [5]  
310 Likewise, Figure 5 shows that TRIF-dependent cytokines are influenced by  
311 knockdown of LPCAT2. TLR4 protein or gene expression is not affected by

312 silencing LPCAT2 (data not shown), however, Figure 4 suggests for the first  
313 time that LPCAT2 may influence lysine acetylation detected on TLR4.

314 In conclusion, the results from this study suggest that TLR4 undergoes lysine  
315 acetylation and LPCAT2 influences the detected lysine acetylation. This lays  
316 a foundation for further research on the role of lysine acetylation on TLR4,  
317 and characterisation of LPCAT2 as a protein acetyltransferase.

## 318 6 References:

319 [1] Chen, L. et al. Inflammatory responses and inflammation-associated  
320 diseases in organs. *Oncotarget* 9, 7204–7218 (2018).

321 [2] Pahwa, R., Goyal, A., Bansal, P. & Jialal, I. Chronic Inflammation  
322 (StatPearls Publishing, PMID: 29630225, 2020).

323 [3] Poltorak, A. et al. Defective lps signaling in c3h/hej and c57bl/10sccr mice:  
324 mutations in tlr4 gene. *Science* 282, 2085–8 (1998).

325 [4] Beutler, B. & Rietschel, E. T. Innate immune sensing and its roots: the story  
326 of endotoxin. *Nat Rev Immunol* 3, 169–76 (2003).



- 327 [5] Abate, W., Alrammah, H., Kiernan, M., Tonks, A. J. & Jackson, S. K.  
328 Lysophosphatidyl- choline acyltransferase 2 (lpcat2) co-localises with tlr4 and  
329 regulates macrophage inflam- matory gene expression in response to lps. *Sci*  
330 *Rep* 10, 10355 (2020).
- 331 [6] Shindou, H. et al. A single enzyme catalyzes both platelet-activating factor  
332 production and membrane biogenesis of inflammatory cells. cloning and  
333 characterization of acetyl-coa:lyso- paf acetyltransferase. *J Biol Chem* 282,  
334 6532–9 (2007).
- 335 [7] Shindou, H., Hishikawa, D., Harayama, T., Eto, M. & Shimizu, T.  
336 Generation of membrane diversity by lysophospholipid acyltransferases. *J*  
337 *Biochem* 154, 21–8 (2013).
- 338 [8] Kihara, Y. et al. Platelet-activating factor production in the spinal cord of  
339 experimental allergic encephalomyelitis mice via the group i va cytosolic  
340 phospholipase a2-lyso-pafat axis. *J Immunol* 181, 5008–14 (2008).
- 341 [9] Kihara, Y. Systematic understanding of bioactive lipids in neuro-immune  
342 interactions: Lessons from an animal model of multiple sclerosis. *Adv Exp Med*  
343 *Biol* 1161, 133–148 (2019).

- 344 [10] Shindou, H. et al. Relief from neuropathic pain by blocking of the  
345 platelet-activating factor- pain loop. *FASEB J* 31, 2973–2980 (2017).
- 346 [11] Hishikawa, D., Hashidate, T., Shimizu, T. & Shindou, H. Diversity and  
347 function of mem- brane glycerophospholipids generated by the remodeling  
348 pathway in mammalian cells. *J Lipid Res* 55, 799–807 (2014).
- 349 [12] Inoue, K. & Tsuda, M. Microglia in neuropathic pain: cellular and  
350 molecular mechanisms and therapeutic potential. *Nat Rev Neurosci* 19, 138–  
351 152 (2018).
- 352 [13] Davenport, E. E. et al. Genomic landscape of the individual host response  
353 and outcomes in sepsis: a prospective cohort study. *Lancet Respir Med* 4, 259–  
354 71 (2016).
- 355 [14] Valentine, W. J., Hashidate-Yoshida, T., Yamamoto, S. & Shindou, H.  
356 Biosynthetic en- zymes of membrane glycerophospholipid diversity as  
357 therapeutic targets for drug develop- ment. *Adv Exp Med Biol* 1274, 5–27  
358 (2020).

- 359 [15] Watanabe, H. et al. Lpcat2 methylation, a novel biomarker for the  
360 severity of cedar pollen allergic rhinitis in japan. *Am J Rhinol Allergy*  
361 1945892420983646 (2020).
- 362 [16] Xiao, X. et al. Robo4 deletion ameliorates paf-mediated skin inflammation  
363 via regulating the mrna translation efficiency of lpcat1/lpcat2 and the  
364 expression of paf receptor. *Int J Biol Sci* 16, 1086–1095 (2020).
- 365 [17] Spange, S., Wagner, T., Heinzl, T. & Krämer, O. H. Acetylation of non-  
366 histone proteins modulates cellular signalling at multiple levels. *Int J Biochem*  
367 *Cell Biol* 41, 185–98 (2009).
- 368 [18] Thevenet, L. et al. Regulation of human sry subcellular distribution by its  
369 acetylation/deacetylation. *EMBO J* 23, 3336–45 (2004).
- 370 [19] Glozak, M. A., Sengupta, N., Zhang, X. & Seto, E. Acetylation and  
371 deacetylation of non-histone proteins. *Gene* 363, 15–23 (2005).
- 372 [20] Choudhary, C. et al. Lysine acetylation targets protein complexes and co-  
373 regulates major cellular functions. *Science* 325, 834–40 (2009).
- 374 [21] Close, P. et al. The emerging role of lysine acetylation of non-nuclear  
375 proteins. *Cell Mol Life Sci* 67, 1255–64 (2010).

- 376 [22] Zou, C. et al. Acyl-coa:lysophosphatidylcholine acyltransferase i (lpcat1)  
377 catalyzes histone protein o-palmitoylation to regulate mrna synthesis. J Biol  
378 Chem 286, 28019–25 (2011).
- 379 [23] Poloamina, V. I. Regulation of The Expression and Lysine Acetylation of  
380 Pro-Inflammatory Molecules By Lipid-Modifying Enzyme (LPCAT2) in  
381 RAW264.7 Cells. Ph.D. thesis, Uni- versity of Plymouth (2021).
- 382 [24] Deng, W. et al. Gps-pail: prediction of lysine acetyltransferase-specific  
383 modification sites from protein sequences. Sci Rep 6, 39787 (2016).
- 384 [25] Gouy, M., Guindon, S. & Gascuel, O. Seaview version 4: A multiplatform  
385 graphical user interface for sequence alignment and phylogenetic tree  
386 building. Mol Biol Evol 27, 221–4 (2010).
- 387 [26] Li, H. et al. Regulation of nf-b activity by competition between rela  
388 acetylation and ubiq- uitination. Oncogene 31, 611–23 (2012).
- 389 [27] Bijlmakers, M.-J. Protein acylation and localization in t cell signaling  
390 (review). Molecular Membrane Biology 26, 93–103 (2009). URL

- 391 [28] Addou, S., Rentzsch, R., Lee, D. & Orengo, C. A. Domain-based and  
392 family-specific sequence identity thresholds increase the levels of reliable  
393 protein function transfer. *J Mol Biol* 387, 416–30 (2009).
- 394 [29] Chesarino, N. M. et al. Chemoproteomics reveals toll-like receptor fatty  
395 acylation. *BMC Biol* 12, 91 (2014).
- 396 [30] UniProt Consortium. Uniprot: the universal protein knowledgebase in  
397 2021. *Nucleic Acids Res* 49, D480–D489 (2021).
- 398 [31] Ping, W. J. TLR4 Acetylation/Methylation Modification Modulates LPS-  
399 Activated Inflammation. Ph.D. thesis, Zhejiang University (2011).
